# Supplementary material
Source: PubMed Central journal article supplement (PMC3136381)

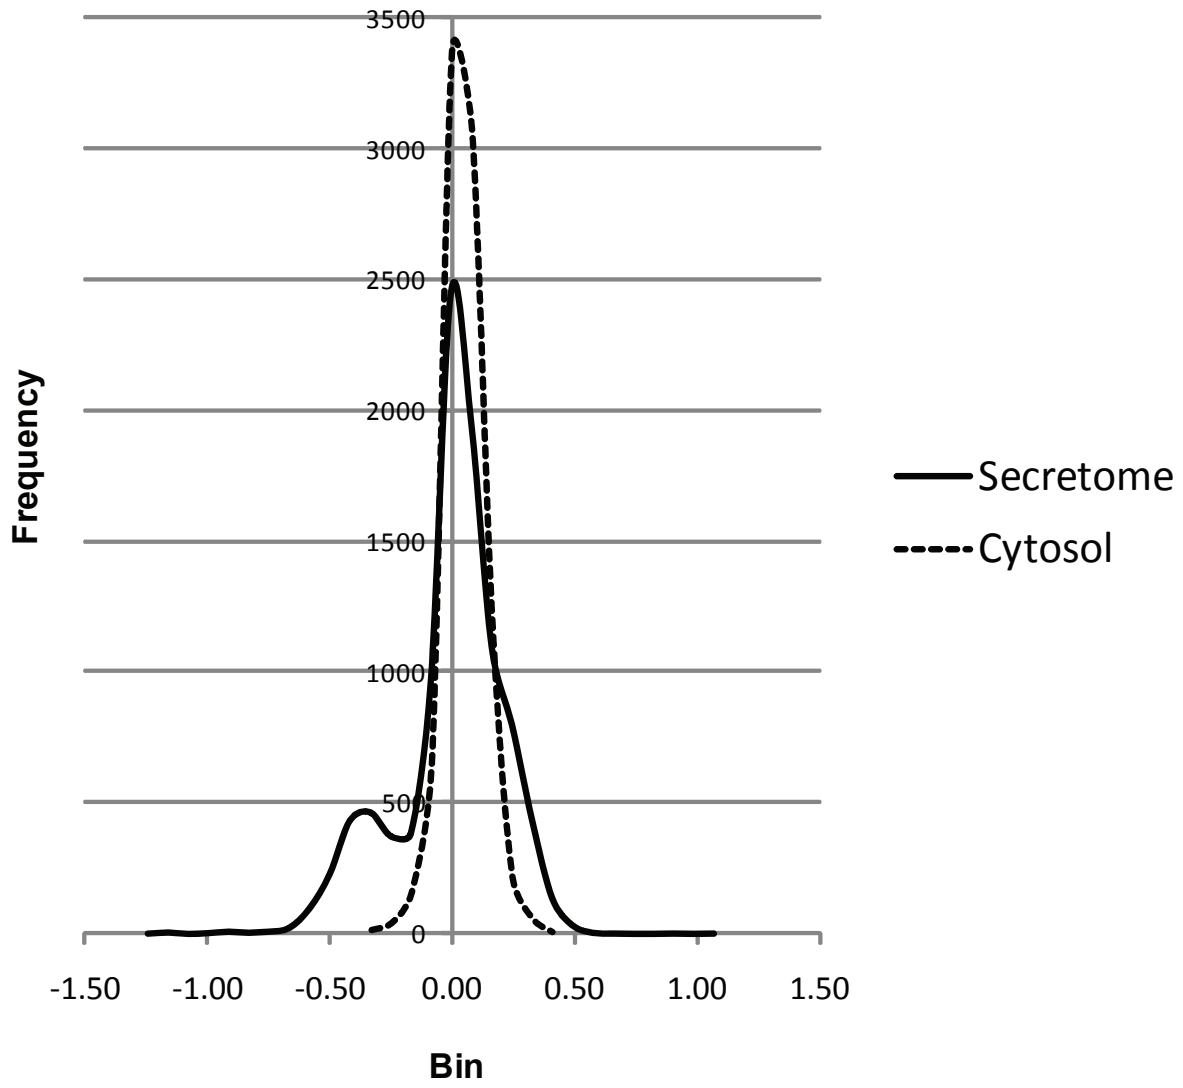

Supplement: NIHMS299910-supplement-9_si_009.pdf [file NIHMS299910-supplement-9_si_009.pdf]
